# Supplementary material for: Endothelial-Ercc1 DNA repair deficiency provokes blood-brain barrier dysfunction
Source: Research Square preprint supplement (doi:10.21203/rs.3.rs-4358616/v1), 2024-08-01
Supplement: Supplementary file 1 [file 6e13a23542591052457b02b3.xlsx]

## Sheet: Sheet1
Table 1: Details on WT and EC-KO mice
Genotype	# mice	m/f
WT	14	2024-08-06
EC-KO	11	2024-03-08
M: male, f: female,
