# Supplementary material for: Endothelial-Ercc1 DNA repair deficiency provokes blood-brain barrier dysfunction
Source: Research Square preprint supplement (doi:10.21203/rs.3.rs-4358616/v1), 2024-08-01
Supplement: Supplementary file 2 [file 927331bbe4dcb05df34355da.xlsx]

## Sheet: Sheet1
Table 2: Primary antibody details
Target	Host	Dilution	Ag retrival/fixation	Supplier	Cat.#	Use
α-SMA	Mouse	1:200	FF, none	Invitrogen	14-9760-82	IHC
CD8	Rabbit	1:200	Citrate	Abcam	ab183685	IHC
CD31	Mouse	1:100	4% PFA	Dako	M0823	ICC
CD45	Rat	1:200	Citrate	BD	553076	IHC
CLDN5	Rabbit	1:50	Methanol	Invitrogen	34-1600	IHC
CLDN5	Mouse	1:50	Methanol	Santa Cruz	sc-374221	ICC
COLLAGEN IV	Rabbit	1:200	FF, Acetone	Abcam	Ab5177	IHC
DLL4	Rat	1:100	4% PFA	R&D systems	207822	ICC
ERCC1	Rabbit	1:1000	none	Abcam	ab129267	WB
GAPDH	Mouse	1:1000	none	Proteintech	60004-1-lg	WB
GFAP	Rabbit	1:400	FF, none	DAKO	Z0334	IHC
yH2AX	Rabbit	1:500	4% PFA	Cell signaling	9718	ICC
IBA1	Goat	1:500	Citrate	Abcam	ab5076	IHC
ICAM1	Rat	1:50	FF, Methanol	Kind gift Bern	In house	IHC
IgG	Rabbit	1:200	4% PFA	Dako	P0260	IHC
LAMININ	Rabbit	1:500	FF, none	Novus	NB300-144	IHC
Lectin I-Rhodamine	-	1:250	None/citrate	Vector	RL-1102	IHC
MFSD2A	Rabbit	1:100	FF, none	Kind gift from Gu Lab	In house	IHC
P21	Rat	1:100	FF, Acetone	abcam	ab107099	IHC
P2RY12	Rabbit	1:100	FF, none	Anaspec	55043A	IHC
PDGFRβ	Rabbit	1:50	FF, none	Abcam	ab32570	IHC
MDR1A	Mouse	1:100	FF, none	Alexis	801-002-C100	IHC
SNAI2	Mouse	1:100	FF, acetone	Abcam	ab51772	IHC
VE-cad	Mouse	1:100	4% PFA	Santa Cruz	sc-9989	ICC
ZO-1	Rabbit	1:100	4% PFA	Zymed	61-7300	ICC
FF: freshly frozen
